# Supplementary figures and images for: Antioxidant capacity develops with maturation in the deep-diving hooded seal
Source: Oxford University Press journal article supplement (doi:10.1242/jeb.057935), 2011-08-10

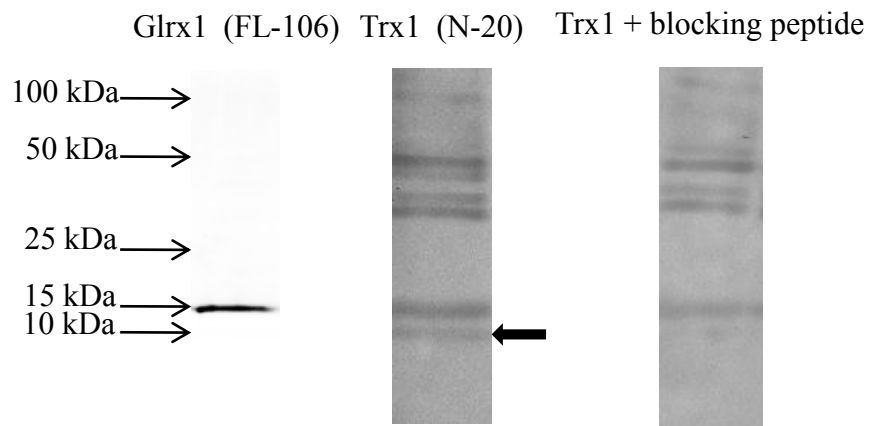

Supplement: jeb057935figs2.pdf [file jeb057935figs2.pdf]
